# Supplementary material for: Predicting Individual Function During COVID-19 Lockdown: Depression, Fear of COVID-19, Age, and Employment
Source: PubMed Central journal article supplement (PMC8280345; doi:10.3389/fpsyg.2021.682122), 2021-07-01
Supplement: Table_1.pdf [file Table_1.pdf]

Supplement Materials

Table S1

*Standard Regression Weights and Indices for the Different Models*

| Results                               | Models  |         |         |         |         |
|---------------------------------------|---------|---------|---------|---------|---------|
|                                       | 1       | 2       | 3       | 4       | 5       |
| $\chi^2$                              | 6.096   | 6.252   | 6.262   | 6.248   | 6.238   |
| <i>df</i>                             | 3       | 3       | 3       | 3       | 3       |
| <i>p</i>                              | .11     | .10     | .10     | .10     | .10     |
| $\chi^2/df$                           | 2.032   | 2.08    | 2.087   | 2.083   | 2.079   |
| <i>CFI</i>                            | .988    | .985    | .987    | .985    | .987    |
| <i>NFI</i>                            | .977    | .974    | .976    | .974    | .976    |
| <i>TLI</i>                            | .939    | .927    | .935    | .927    | .935    |
| <i>RMSEA</i>                          | .045    | .046    | .046    | .046    | .046    |
| <i>β for the correlation between:</i> |         |         |         |         |         |
| Age and Fear of COVID-19              | -.17*** | -.05    | -.21*** | .05     | -.20*** |
| Age and Depression                    | -.21*** | -.21*** | -.21*** | -.21*** | -.21*** |
| Employment and Fear of COVID-19       | -.07    | -.02    | -.03    | -.04    | .01     |
| Employment and Depression             | -.14**  | -.14**  | -.14**  | -.14**  | -.14**  |
| Fear of COVID-19 and Function         | -.03    | .02     | .003    | -.01    | .01     |
| Depression and Function               | -.55*** | -.56*** | -.56*** | -.55*** | -.56*** |

\* $p < .05$ ; \*\* $p < .01$ ; \*\*\* $p < .001$

Model 1 – Mean score on fear of COVID-19

Model 2- Fear about contracting COVID-19

Model 3- Fear about a family member contracting COVID-19

Model 4- Fear about dying from COVID-19

Model 5- Fear about a family member dying from COVID-19
